# Supplementary material for: Three-fold interpenetrated metal–organic framework as a multifunctional fluorescent probe for detecting 2,4,6-trinitrophenol, levofloxacin, and l-cystine
Source: Royal Society of Chemistry journal article supplement (doi:10.1039/d1ce01590g), 2022-01-01
Supplement: d1ce01590g1.pdf [file d1ce01590g1.pdf]

# Three-fold Interpenetrated Metal–Organic Framework as a Multifunctional Fluorescent Probe for Detecting 2,4,6-Trinitrophenol, Levofloxacin and L- Cystine

Han-Fu Liu,<sup>a</sup> Ye-Tao,<sup>a</sup> Xiao-Huan Qin,<sup>a</sup> Chao-Chen,<sup>a</sup> Fu-Ping Huang,<sup>\*a</sup> Xiu-Qing Zhang,<sup>\*c</sup> and He-Dong Bian<sup>\*ab</sup>

## Author information

### Corresponding Author

Fu-Ping Huang\* Email: huangfp2010@163.com

Xiu-Qing Zhang\* Email: glutchem@163.com

He-Dong Bian\* Email: gxunchem@163.com

## Orcid ID

Han-Fu Liu: <https://orcid.org/0000-0002-5418-5560>

Ye-Tao: <https://orcid.org/0000-0002-5981-3976>

Xiao-Huan Qin: <https://orcid.org/0000-0002-0492-3895>

Chao-Chen: <https://orcid.org/0000-0001-9378-7778>

Xiu-Qing Zhang: <https://orcid.org/0000-0002-2863-8140>

Fu-Ping Huang: <https://orcid.org/0000-0003-4227-9815>

He-Dong Bian: <https://orcid.org/0000-0003-4654-9085>

---

*a.* State Key Laboratory for Chemistry and Molecular Engineering of Medicinal Resources, School of Chemistry and Pharmaceutical Sciences, Guangxi Normal University, Guilin 541004, P. R. China.

*b.* School of Chemistry and Chemical Engineering, Guangxi University for Nationalities, Key Laboratory of Chemistry and Engineering of Forest Products, Nanning, 530008, P. R. China.

*c.* College of Chemistry and Bioengineering, Guangxi Key Laboratory of Electrochemical and Magnetochemical Functional Materials, Guilin University of Technology, Guilin, P.R. China.

† E-mail: huangfp2010@163.com (F.-P. Huang), telephone and fax numbers: +86-0773-2535678; gxunchem@163.com (H.-D. Bian); glutchem@163.com (X.-Q. Zhang)

Electronic Supplementary Information (ESI) available: CCDC 2107479.

SQUEEZE results for **1** are as follows:

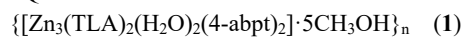

loop\_

| _platon_squeeze_void_nr | _platon_squeeze_void_average_x | _platon_squeeze_void_average_y | _platon_squeeze_void_average_z | _platon_squeeze_void_volume | _platon_squeeze_void_count_electrons | _platon_squeeze_void_content |
|-------------------------|--------------------------------|--------------------------------|--------------------------------|-----------------------------|--------------------------------------|------------------------------|
| 1                       | -0.009                         | 0.107                          | 0.750                          | 336                         | 90''                                 |                              |
| 2                       | -0.044                         | 0.393                          | 0.250                          | 336                         | 90''                                 |                              |
| 3                       | 0.000                          | 0.458                          | 0.750                          | 8                           | 0''                                  |                              |
| 4                       | 0.000                          | 0.542                          | 0.250                          | 8                           | 0''                                  |                              |
| 5                       | -0.045                         | 0.607                          | 0.750                          | 336                         | 90''                                 |                              |
| 6                       | -0.010                         | 0.893                          | 0.250                          | 336                         | 90''                                 |                              |
| 7                       | 0.500                          | 0.042                          | 0.250                          | 8                           | 0''                                  |                              |
| 8                       | 0.500                          | 0.958                          | 0.750                          | 8                           | 0''                                  |                              |

That is, SQUEEZE gives 360 electrons/unit cell for the voids. If these electrons are all from CH<sub>3</sub>OH (18 e<sup>-</sup>), each unit cell has 360/18 = 20 CH<sub>3</sub>OH molecules, and each formula unit has 5 CH<sub>3</sub>OH molecules (since Z = 4). So the suitable formula for this compound should be {[Zn<sub>3</sub>(TLA)<sub>2</sub>(H<sub>2</sub>O)<sub>2</sub>(4-abpt)<sub>2</sub>] · 5CH<sub>3</sub>OH}<sub>n</sub>.

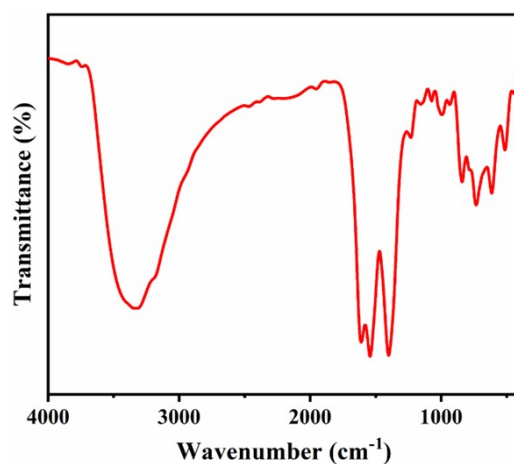

Figure S1. IR spectra of complex **1**.

**Table S1.** Crystal data and structure refinement for compound **1** (squeeze)

| Identification code                     | <b>1</b>                                                                        |
|-----------------------------------------|---------------------------------------------------------------------------------|
| Empirical formula                       | C <sub>42</sub> H <sub>30</sub> N <sub>12</sub> O <sub>14</sub> Zn <sub>3</sub> |
| Formula weight                          | 1122.89                                                                         |
| Temperature/K                           | 293(2)                                                                          |
| Crystal system                          | monoclinic                                                                      |
| Space group                             | C2/c                                                                            |
| a/Å                                     | 10.086(2)                                                                       |
| b/Å                                     | 30.644(6)                                                                       |
| c/Å                                     | 17.347(4)                                                                       |
| $\alpha$ /°                             | 90                                                                              |
| $\beta$ /°                              | 90.27(3)                                                                        |
| $\gamma$ /°                             | 90                                                                              |
| Volume/Å <sup>3</sup>                   | 5361.5(19)                                                                      |
| Z                                       | 4                                                                               |
| $\rho_{\text{calc}}/\text{cm}^3$        | 1.391                                                                           |
| $\mu/\text{mm}^{-1}$                    | 1.400                                                                           |
| F(000)                                  | 2272.0                                                                          |
| Reflections collected                   | 15080                                                                           |
| Independent reflections                 | 4700 [ $R_{\text{int}} = 0.0692$ , $R_{\text{sigma}} = 0.0687$ ]                |
| Data/restraints/parameters              | 4700/18/334                                                                     |
| Goodness-of-fit on F <sup>2</sup>       | 1.031                                                                           |
| Final R indexes [ $I \geq 2\sigma(I)$ ] | $R_1 = 0.0550$ , $wR_2 = 0.1207$                                                |
| Final R indexes [all data]              | $R_1 = 0.0740$ , $wR_2 = 0.1279$                                                |

**Table S2** Selected Bond Lengths (Å) and Angles (°) for **1**

| Bond Lengths (Å) |             |             |             |
|------------------|-------------|-------------|-------------|
| Zn1—O2A          | 2.170 (3)   | Zn1—N6      | 2.128 (4)   |
| Zn1—O3B          | 2.176 (3)   | Zn2—O1A     | 2.008 (3)   |
| Zn1—O4B          | 2.197 (3)   | Zn2—O1      | 2.008 (3)   |
| Zn1—O6           | 1.996 (3)   | Zn2—N1C     | 2.066 (4)   |
| Zn1—O7           | 2.163 (3)   | Zn2—N1D     | 2.066 (4)   |
| Bond Angles (°)  |             |             |             |
| O2A—Zn1—O3B      | 93.70 (12)  | O1A—Zn2—O1  | 144.21 (17) |
| O2A—Zn1—O4B      | 93.00 (11)  | O1—Zn2—N1D  | 97.88 (14)  |
| O3B—Zn1—O4B      | 60.66 (11)  | O1A—Zn2—N1C | 97.88 (14)  |
| O6—Zn1—O2A       | 86.96 (11)  | O1A—Zn2—N1D | 104.07 (14) |
| O6—Zn1—O3B       | 105.53 (12) | O1—Zn2—N1C  | 104.07 (14) |
| O6—Zn1—O4B       | 166.17 (12) | N1C—Zn2—N1D | 103.5 (2)   |
| O6—Zn1—O7        | 92.32 (12)  | N6—Zn1—O2A  | 87.32 (13)  |
| O6—Zn1—N6        | 97.98 (13)  | N6—Zn1—O3B  | 156.49 (12) |
| O7—Zn1—O2A       | 178.67 (12) | N6—Zn1—O4B  | 95.83 (13)  |
| O7—Zn1—O3B       | 85.40 (12)  | N6—Zn1—O7   | 93.89 (14)  |
| O7—Zn1—O4B       | 87.43 (12)  |             |             |

Symmetry codes: (A)  $-x+1, y, -z+3/2$ ; (B)  $x-1/2, -y+1/2, z-1/2$ ; (C)  $x-1, -y+1, z+1/2$ ; (D)  $-x+2, -y+1, -z+1$ ; (E)  $x+1/2, -y+1/2, z+1/2$ .

**Table S3.** SHAPE analysis of Zn(II) ions in **1**.

|                     | ZnO <sub>2</sub> N <sub>2</sub>                                                   | ZnO <sub>5</sub> N                                                                  |
|---------------------|-----------------------------------------------------------------------------------|-------------------------------------------------------------------------------------|
| Coordination modes  | 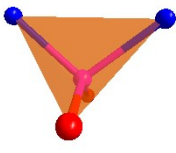 |  |
| label               | SS-4                                                                              | OC-6                                                                                |
| symmetry            | C <sub>2v</sub>                                                                   | Oh                                                                                  |
| shape               | SeeSaw                                                                            | Octahedron                                                                          |
| Calculation results | Distortion( $\tau_{\min}$ )                                                       |                                                                                     |
|                     | Zn1 (2.609)                                                                       | Zn2 (2.285)                                                                         |

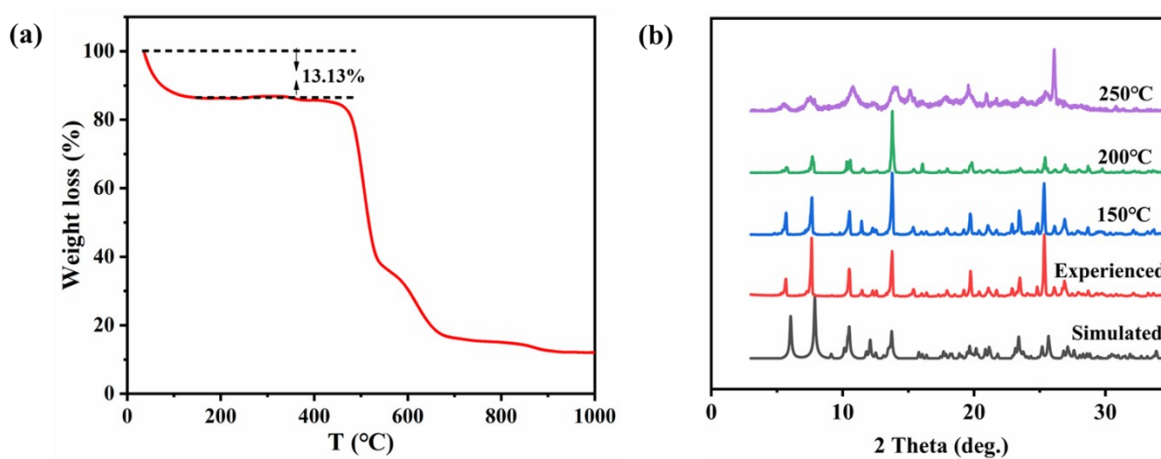

**Figure S2.** (a) TGA curve of **1**. (b) PXRD patterns of **1** at different temperatures and the simulated one calculated from the single crystal structure analysis.

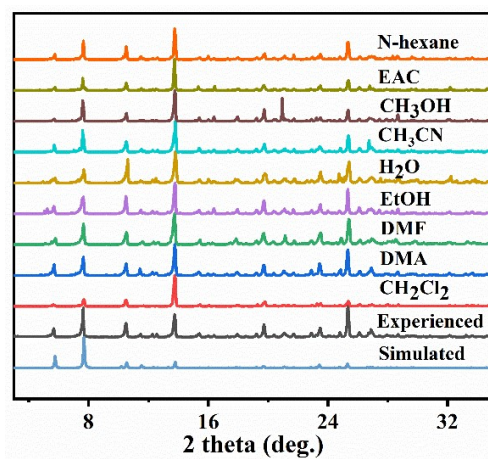

Figure S3. The PXR D patterns of 1 treated in different solvents.

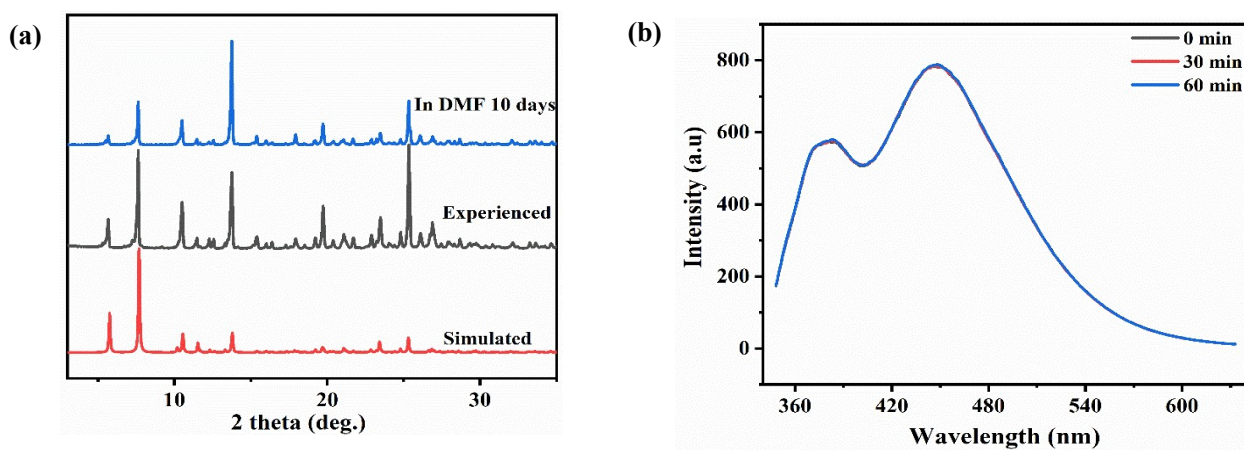

Figure S4. (a) PXR D of compound 1 in DMF for 10 days (b) Fluorescence measurements of 1 immersed into the DMF solvent as the suspensions for 0 min and after 60 min

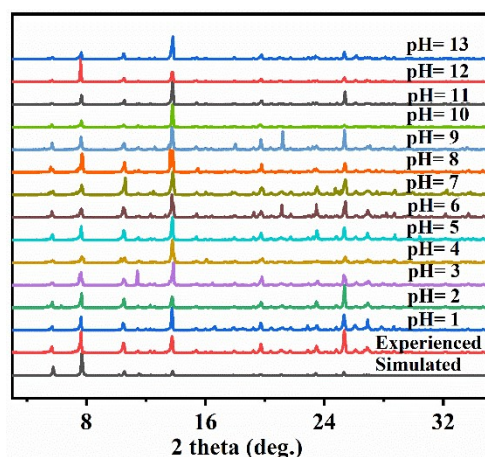

Figure S5. PXRD patterns of **1** in different pH values in the range of 1-13.

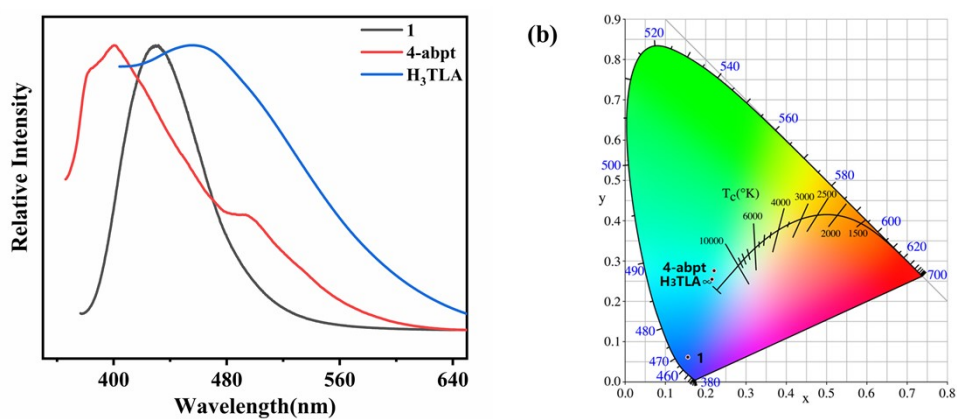

Figure S6. (a) (b) The solid luminescent emissions of ligand H<sub>3</sub>TLA, 4-abpt and **1**.

### K<sub>sv</sub> and LOD calculation methods

The quantitative fluorescent quenching efficiency of **1** (for analyte) using the Stern–Völmer (S–V) equation.<sup>1</sup>

$$(I_0/I) = 1 + K_{SV} C \text{ ----- (1) ,}$$

Where I is the fluorescence intensity at TNP concentration of C, and I<sub>0</sub> signifies the initial fluorescence intensity of the MOF.

The quenching constant is indicated by K<sub>sv</sub> (M<sup>-1</sup>). A linear curve is obtained at relatively low concentrations of analyte. The equation

$$\text{LOD} = 3\sigma/K_{sv} \text{ ----- (2) ,}$$

(where σ signifies the standard deviation of the initial fluorescence intensity of MOF) was used to calculate the detection limit of analyte.

**Table S4.** K<sub>sv</sub> and LOD of MOF-based luminescent sensors for TNP, LVX and L-Cys

| MOF-based fluorescent materials                                                                                                                                                  | Analyte | Quenching constant (M <sup>-1</sup> ) | Detection limits | Recycle ability | Ref              |
|----------------------------------------------------------------------------------------------------------------------------------------------------------------------------------|---------|---------------------------------------|------------------|-----------------|------------------|
| [Zn <sub>3</sub> (TLA) <sub>2</sub> (H <sub>2</sub> O) <sub>2</sub> (4-abpt) <sub>2</sub> ] <sub>n</sub> ·5CH <sub>3</sub> OH                                                    | TNP     | 4.23×10 <sup>5</sup>                  | 5.24 μM          | Yes             | <b>This work</b> |
| [Cd <sub>3</sub> (NTB) <sub>2</sub> (DPP)(DMA) <sub>2</sub> ] <sub>n</sub> ·4DMA                                                                                                 | TNP     | 4.1×10 <sup>4</sup>                   | 9.5 μM           |                 | 2                |
| [Cd <sub>3</sub> (NTB) <sub>2</sub> (DPP) <sub>2</sub> ] <sub>n</sub> ·3DMA·H <sub>2</sub> O                                                                                     | TNP     | 4.89×10 <sup>4</sup>                  | 8.0 μM           |                 | 2                |
| {[Zn <sub>4</sub> (μ <sub>3</sub> -OH) <sub>2</sub> (BTC) <sub>2</sub> (BBI4PY) <sub>2</sub> ] <sub>n</sub> ·10H <sub>2</sub> O}                                                 | TNP     | 2.94×10 <sup>4</sup>                  | 7.86 μM          |                 | 3                |
| {[Cd <sub>4</sub> (HDDCP) <sub>2</sub> (4,4'-bibp) <sub>2</sub> (H <sub>2</sub> O) <sub>2</sub> ] <sub>n</sub> ·2.5(DOA)·1.5(H <sub>2</sub> O)}                                  | TNP     | 7.31×10 <sup>5</sup>                  | 3.92 μM          |                 | 4                |
| {[Cd <sub>2</sub> (HDDCP)(1,4-bib)(H <sub>2</sub> O)] <sub>n</sub> ·H <sub>2</sub> O}                                                                                            | TNP     | 3.71×10 <sup>5</sup>                  | 7.84 μM          |                 | 4                |
| Zr-NDI MOF                                                                                                                                                                       | TNP     | 4.057×10 <sup>4</sup>                 | 35.36 μM         |                 | 5                |
| {(Me <sub>2</sub> NH <sub>2</sub> ) <sub>4</sub> [Eu <sub>4</sub> (DDAC) <sub>3</sub> (HCO <sub>2</sub> )(OH <sub>2</sub> ) <sub>2</sub> ] <sub>n</sub> ·8DMF·9H <sub>2</sub> O} | TNP     | 8.6 × 10 <sup>4</sup>                 | 3.5 μM           |                 | 6                |
| Zn <sub>5</sub> (μ <sub>3</sub> -OH) <sub>2</sub> (TDA) <sub>4</sub> (4,4'-bpt) <sub>2</sub>                                                                                     | TNP     | 1.856×10 <sup>5</sup>                 | 1.59 μM          | Yes             | 7                |
| [Cd(NDC)(H <sub>2</sub> O)] <sub>n</sub>                                                                                                                                         | TNP     | 2.385×10 <sup>4</sup>                 | 4 μM             | Yes             | 8                |
| [Zn <sub>4</sub> (DMF)(Ur) <sub>2</sub> (2,6-NDC) <sub>4</sub> ] <sub>n</sub>                                                                                                    | TNP     | 10.83×10 <sup>4</sup>                 | 7.11 μM          |                 | 9                |
| {[Cd <sub>4</sub> (L) <sub>2</sub> (L <sub>2</sub> ) <sub>3</sub> (H <sub>2</sub> O) <sub>2</sub> ] <sub>n</sub> ·8DMF·8H <sub>2</sub> O}                                        | TNP     | 3.89×10 <sup>4</sup>                  | 8.64 μM          | Yes             | 10               |

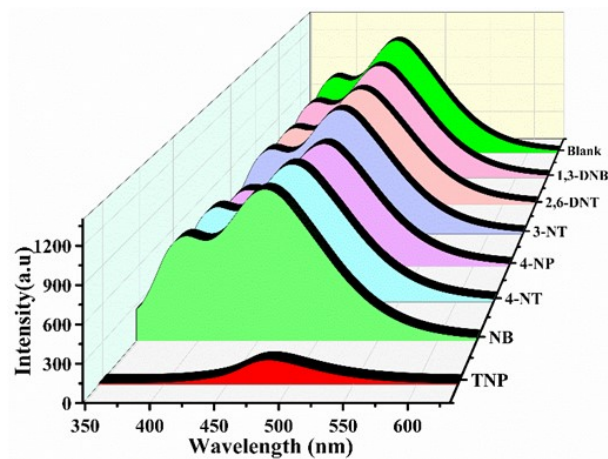**Figure S7.** The luminescence intensity of 1- nitroaromatic at 458 nm in 40 μM different nitroaromatics.



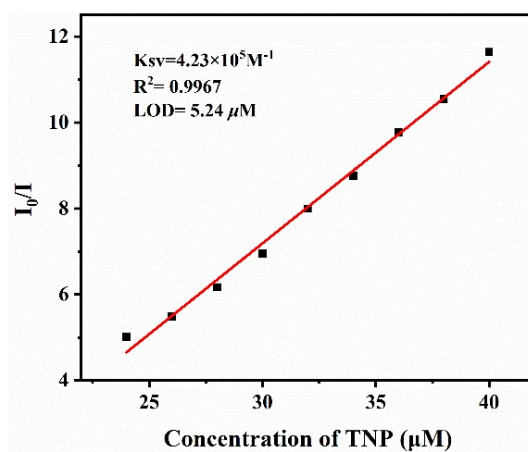

Figure S8 The Stern–Volmer plot of  $I_0/I$  versus TNP concentration.

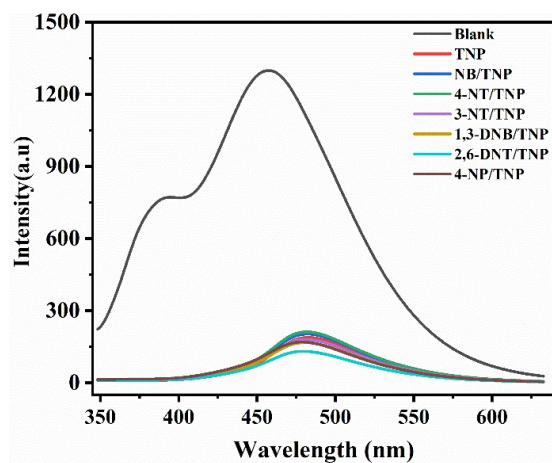

Figure S9. The luminescence intensity of **1**- TNP under other nitroaromatics.

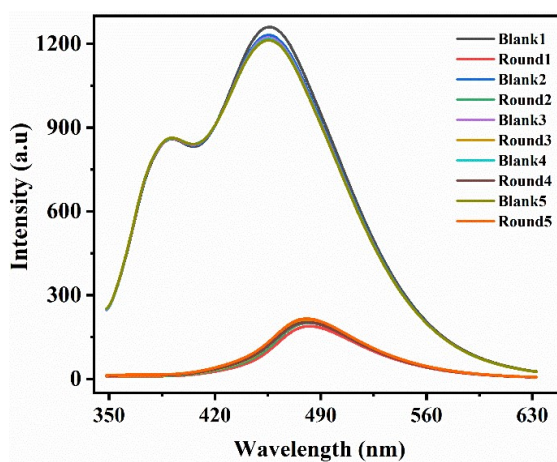

Figure S10. The quenching and recyclability test of **1**, the upper lines represent the initial fluorescence intensity and the lower lines represent the fluorescence intensity upon addition of  $40 \mu\text{M}$  TNP solution.

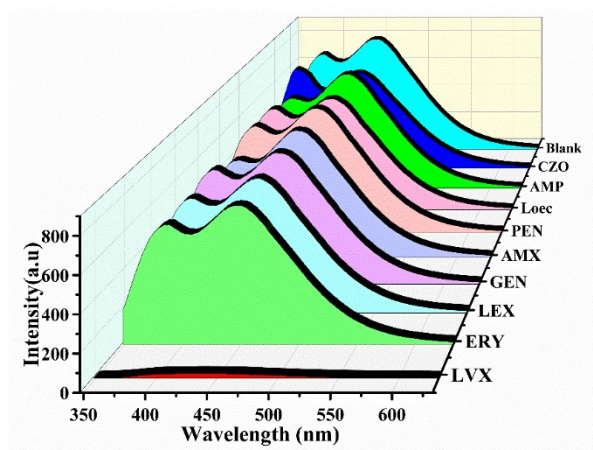

Figure S11. The luminescence intensity of 1- antibiotics at 458 nm in 60 μM different antibiotics.

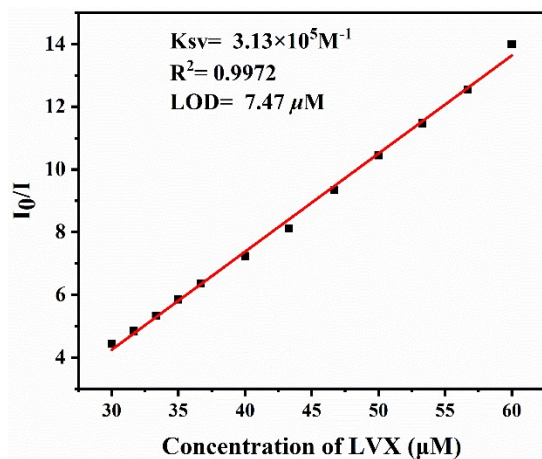

Figure S12 Stern-Volmer plot of  $I_0/I$  versus LVX concentration.

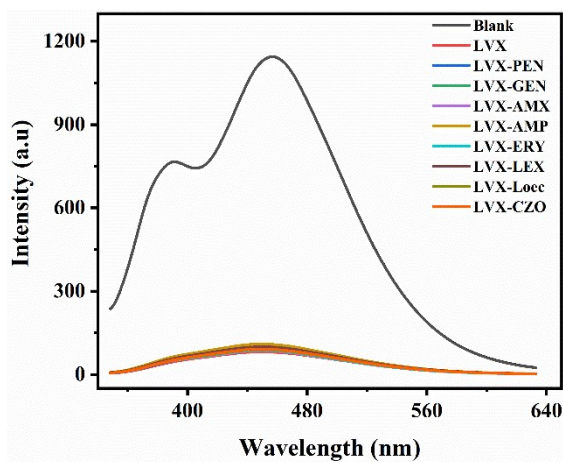

Figure S13. The luminescence intensity of 1- LVX under mixed antibiotics.

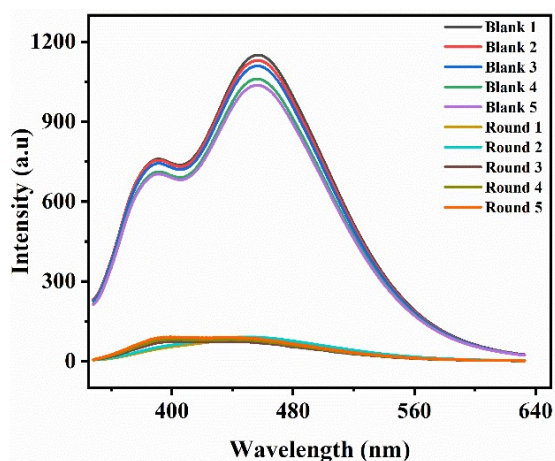

**Figure S14.** The quenching and recyclability of **1**, the upper lines represent the initial fluorescence intensity and the lower lines represent the fluorescence intensity upon addition of 60  $\mu\text{M}$  LVX solution.

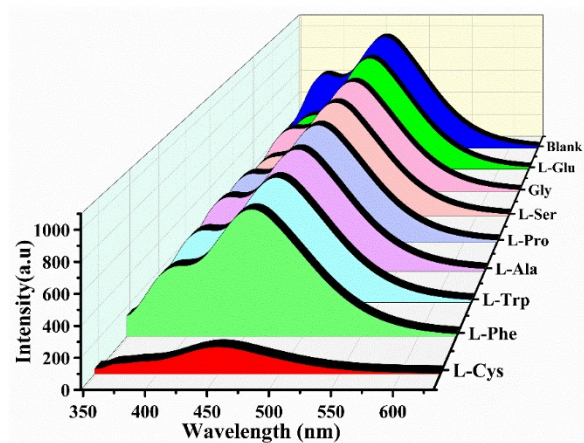

**Figure S15.** The luminescence intensity of **1**- amino acids at 458nm.

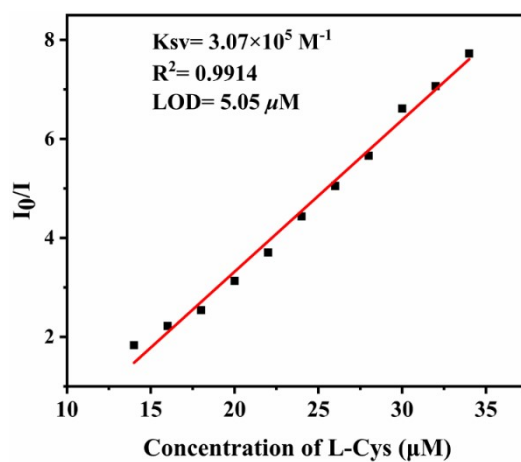

**Figure S16** Stern–Volmer plot of  $I_0/I$  versus L-Cys concentration.

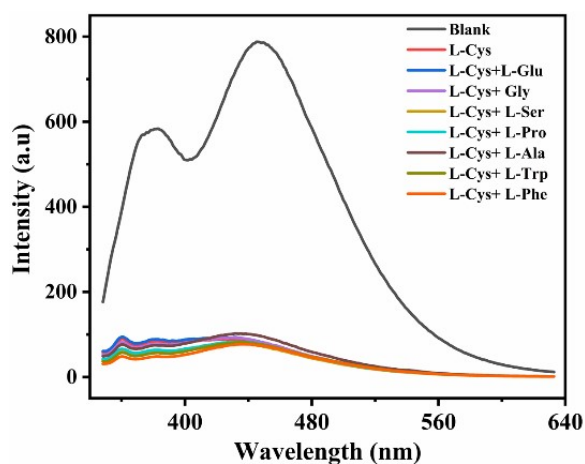

Figure S17. Luminescence intensity of **1** dispersed in a mixture of other amino acids with L-Cys.

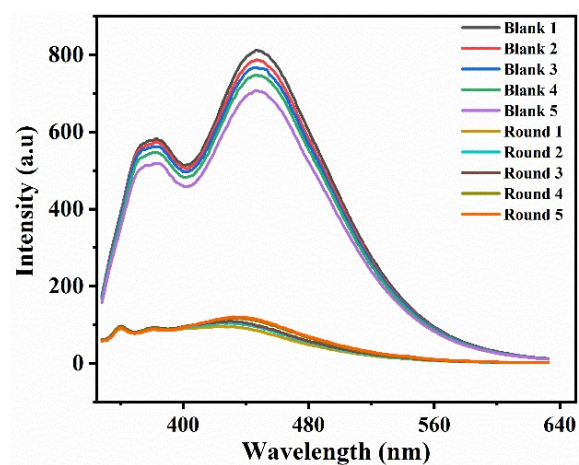

Figure S18. The quenching and recyclability of **1**, the upper lines represent the initial fluorescence intensity and the lower lines represent the fluorescence intensity upon addition of  $40 \mu\text{M}$  L-Cys solution.

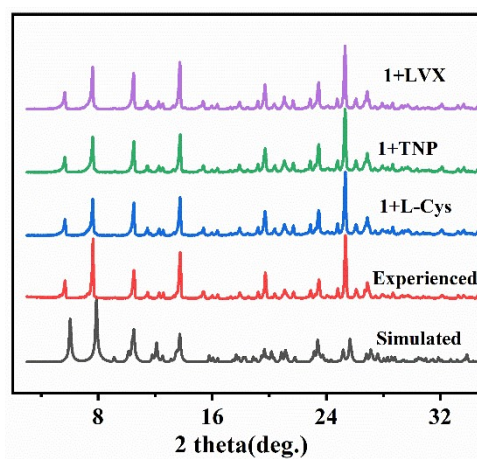

Figure S19. PXRD patterns of **1** after experiment.



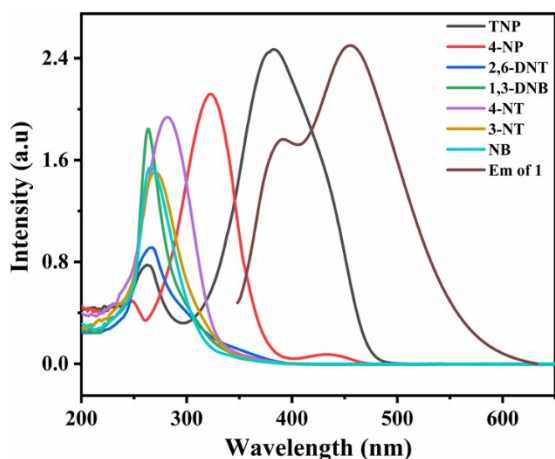

**Figure S20.** UV-vis spectral profiles of different nitroaromatics recorded in H<sub>2</sub>O solution and E<sub>m</sub> of **1** in DMF.

**Table S5.** HOMO and LUMO energy levels of different nitro-analytes

| Analytes        | 3-NT <sup>11</sup> | TNP <sup>12</sup> | NB <sup>13</sup> | 1,3-DNB | 2,6-DNT <sup>14</sup> | 4-NT <sup>13</sup> | 4-NP <sup>13</sup> |
|-----------------|--------------------|-------------------|------------------|---------|-----------------------|--------------------|--------------------|
| LOMO            | -2.83893           | -3.92             | -2.42            | -2.83   | -3.306                | -2.79              | -2.75              |
| HOMO            | -7.55031           | -8.27             | -7.56            | -7.81   | -8.391                | -7.70              | -7.34              |
| Energy Gap (ev) | 4.71138            | 4.35              | 5.14             | 4.98    | 5.085                 | 4.91               | 4.59               |

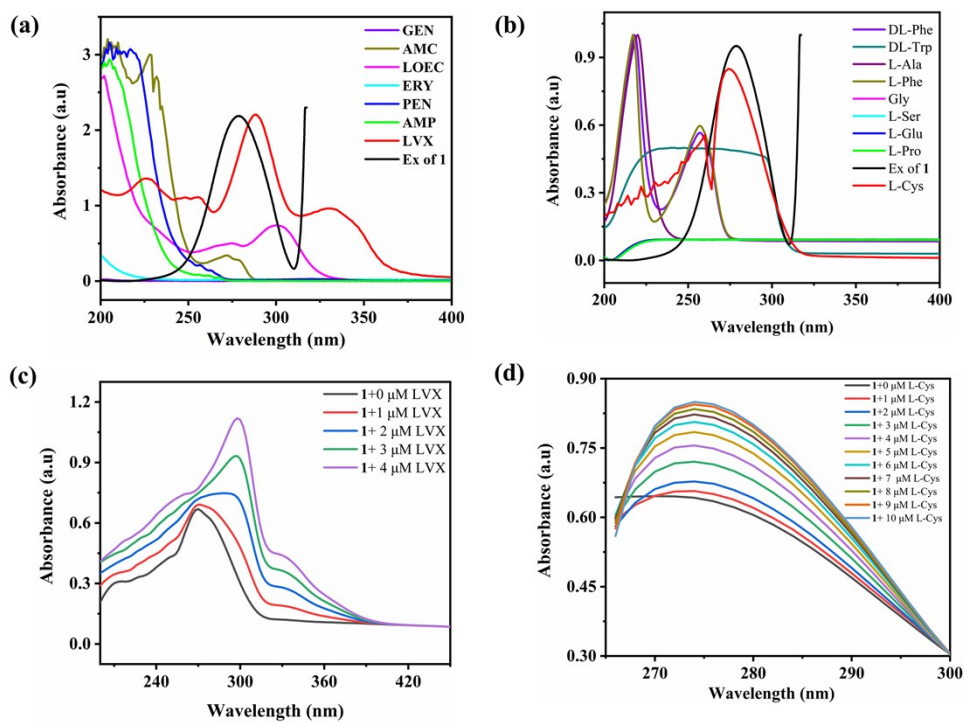

**Figure S21.** (a) UV-vis absorption spectra of various antibiotics (b) and various amino acids, (c) UV-vis absorption spectra of **1** upon addition of different concentrations of LVX and (d) L-Cys.

## References

1. S. Senthilkumar, R. Goswami, V. J. Smith, H. C. Bajaj and S. Neogi, *ACS Sustain. Chem. Eng.*, 2018, **6**, 10295-10306.
2. K. Wang, X.-L. Hu, X. Li, Z.-M. Su and E.-L. Zhou, *J. Solid State Chem.*, 2021, **298** 122128.
3. S. Khan, P. Das and S. K. Mandal, *Inorg. Chem.*, 2020, **59**, 4588-4600.
4. R. Guo, L. Gao, J. Liang, Z. Zhang, J. Zhang, X. Niu and T. Hu, *CrystEngComm*, 2020, **22**, 6927-6934.
5. G. Radha, T. Leelasree, D. Muthukumar, R. S. Pillai and H. Aggarwal, *New J. Chem.*, 2021, **45**, 12931-12937.
6. H. Chen, Z. Zhang, T. Hu and X. Zhang, *Inorg. Chem. Front.*, 2021, **8**, 4376-4385.
7. H. F. Liu, Y. Tao, T. X. Wu, H. Y. Li, X. Q. Zhang, F. P. Huang and H. D. Bian, *Appl. Organomet. Chem.*, 2021, DOI: 10.1002/aoc.6456.
8. P. Ghosh, S. K. Saha, A. Roychowdhury and P. Banerjee, *Eur. J. Inorg. Chem.*, 2015, **2015**, 2851-2857.
9. S. Mukherjee, A. V. Desai, B. Manna, A. I. Inamdar and S. K. Ghosh, *Cryst. Growth Des.* 2015, **15**, **9**, 4627-4634.
10. T. K. Pal, N. Chatterjee and P. K. Bharadwaj, *Inorg. Chem.*, 2016, **55**, 1741-1747.
11. X. Zhang, C. Ge, N. Zhang, Y. Duan, Y. Wang, L. Zhao, X. Zhuang, J. Li, J. Wu and Q. Yang, *Inorg. Chim. Acta*, 2019, **496**.
12. B.-X. Dong, Y.-M. Pan, W.-L. Liu and Y.-L. Teng, *Cryst. Growth Des.*, 2017, **18**, 431-440.
13. R. Goswami, S. C. Mandal, B. Pathak and S. Neogi, *ACS Appl Mater Interfaces*, 2019, **11**, 9042-9053.
14. F.-M. Wang, L. Zhou, W. P. Lustig, Z. Hu, J.-F. Li, B.-X. Hu, L.-Z. Chen and J. Li, *Cryst. Growth Des.*, 2018, **18**, 5166-5173.
